# Supplementary material for: Direct growth of mesoporous anatase TiO2 on nickel foam by soft template method as binder-free anode for lithium-ion batteries
Source: Royal Society of Chemistry journal article supplement (doi:10.1039/c4ra08395d), 2014-01-01
Supplement: c4ra08395d1.pdf [file c4ra08395d1.pdf]

## Supporting Information

### Direct Growth of Mesoporous Anatase TiO<sub>2</sub> on Nickel Foam by Soft Template Method as Binder-free Anode for Lithium-Ion Batteries

Yufeng Jiang,<sup>a</sup> Gen Chen,<sup>a</sup> Xun Xu,<sup>a</sup> Xiaohong Chen,<sup>a,b</sup> Shuguang Deng,<sup>a</sup> Sergei Smirnov,<sup>c</sup> Hongmei Luo,<sup>\*a</sup> and Guifu Zou<sup>\*d</sup>

<sup>a</sup>Department of Chemical and Materials Engineering, New Mexico State University, Las Cruces, New Mexico 88003, USA. E-mail: hluo@nmsu.edu; Fax: +1-575-646-7706; Tel: +1-575-646-4204

State Key Laboratory of Chemical Resource Engineering, Key <sup>b</sup>Laboratory of Carbon Fiber and Functional Polymers, Ministry of Education, Beijing University of Chemical Technology, Beijing, P. R. China

<sup>c</sup>Department of Chemistry and Biochemistry, New Mexico State University, Las Cruces, New Mexico 88003, USA.

<sup>d</sup>College of Physics, Optoelectronics and Energy & Collaborative Innovation Center of Suzhou Nano Science and Technology, Soochow University, Suzhou 215000, P. R. China. E-mail: [zouguifu@suda.edu.cn](mailto:zouguifu@suda.edu.cn), Fax: +86-512-65228130; Tel: +86-512-65228130

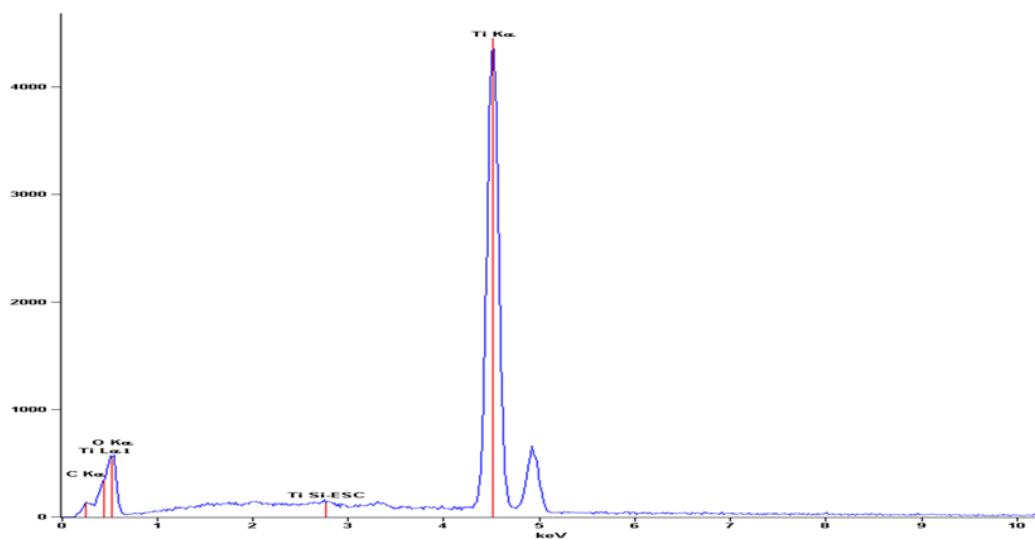

**Fig. S1.** Energy dispersive X-ray spectroscopy (EDS) of mesoporous TiO<sub>2</sub> heated at 450 °C.
